# Supplementary material for: Construction and Characterization of Normalized cDNA Libraries by 454 Pyrosequencing and Estimation of DNA Methylation Levels in Three Distantly Related Termite Species
Source: PLOS journal article supplement (doi:10.1371/journal.pone.0076678), 2013-09-30
Supplement: S8 (10.1371/journal.pone.0076678.s008) [file journal.pone.0076678.s008]

**Table S3. Summary of samples used for cDNA library construction in *Nasutitermes takasagoensis*.**

Caste, sex, and description of samples, number of individuals, and field colonies from which termite samples originated are shown.

| category ID | caste                    | sex               | description                                                                                 | n                   | colony |
|-------------|--------------------------|-------------------|---------------------------------------------------------------------------------------------|---------------------|--------|
| 1           | egg                      | unidentified      | embryos at various developmental stages                                                     | 156 mg <sup>‡</sup> | A      |
| 2           | larva                    | unidentified      | 1st instar undifferentiated individuals                                                     | 100                 | A      |
| 3           | 2nd instar               | unidentified      | 2nd instar individuals                                                                      | 90                  | A      |
| 4           | nymph 3                  | male              | 4th instar individuals with wing buds                                                       | 12                  | B      |
| 5           | nymph 3                  | female            | 4th instar individuals with wing buds                                                       | 2                   | B      |
| 6           | nymph 4                  | male              | 5th instar individuals with wing buds                                                       | 10                  | A      |
| 7           | nymph 4                  | female            | 5th instar individuals with wing buds                                                       | 10                  | A      |
| 8           | nymph 5                  | male              | 6th instar individuals with wing buds                                                       | 10                  | A      |
| 9           | nymph 5                  | female            | 6th instar individuals with wing buds                                                       | 10                  | A      |
| 10          | nymph 5                  | male              | 6th instar individuals with wing buds                                                       | 6                   | A      |
| 11          | nymph 5                  | female            | 6th instar individuals with wing buds                                                       | 6                   | A      |
| 12          | alate                    | male              | winged adults shortly after the molting from nymphs                                         | 12                  | A      |
| 13          | alate                    | female            | winged adults shortly after the molting from nymphs                                         | 6                   | A      |
| 14          | alate                    | male              | winged adults just before swarm                                                             | 6                   | A      |
| 15          | alate                    | female            | winged adults just before swarm                                                             | 6                   | A      |
| 16          | king                     | male              | a mature king collected from a mature colony                                                | 1                   | C      |
| 17          | queen                    | female            | a mature, physogastric queen collected from a mature colony                                 | 1                   | C      |
| 18          | worker                   | male and female   | 3rd and greater instars of apterous individuals, including minor, medium, and major workers | 80                  | A      |
| 19          | minor worker             | male <sup>*</sup> | 3rd-instar individuals without wings and wing buds and any soldier-like characters          | 100                 | A      |
| 20          | JHA-treated minor worker | male <sup>*</sup> | minor workers that experienced hydroprene application for 7 days <sup>‡</sup>               | 240                 | A      |
| 21          | JHA-treated              | male <sup>*</sup> | minor workers that experienced hydroprene application for 14 days <sup>‡</sup>              | 254                 | A      |

|    |                             |        |                                                                                |    |   |
|----|-----------------------------|--------|--------------------------------------------------------------------------------|----|---|
|    | minor worker                |        |                                                                                |    |   |
| 22 | JHA-treated<br>minor worker | male * | minor workers that experienced hydroprene application for 21 days <sup>†</sup> | 95 | A |
| 23 | presoldier                  | male * | individuals developmentally anteceding soldiers                                | 54 | A |
| 24 | JHA-induced<br>Presoldier   | male * | presoldiers that existed in 2-week colonies with hydroprene <sup>†</sup>       | 5  | A |
| 25 | soldier                     | male * | individuals with sclerotized heads and nasutes for defense                     | 90 | A |

The terms to designate the castes followed Hojo et al. (2004) for worker castes and Watson and Abbey (1977) for nymph castes.

\*Because sex of the minor workers, presoldiers and soldiers are all male in *Nasutitermes* according to Noirot (1955), sex of them was not checked in this study.

<sup>†</sup>For more detailed method of artificial colony establishment and sampling, see “Materials and Methods”.

<sup>‡</sup>All eggs were weighed together.

## References

- Hojo M, Koshikawa S, Matsumoto T, Miura T (2004) Developmental pathways and plasticity of neuter castes in *Nasutitermes takasagoensis* (Isoptera: Termitidae). *Sociobiology* 44: 433-441.
- Noirot C (1955) Recherches sur le polymorphisme des termites superieurs (Termitidae). *Ann des Sci Nat Zool* 17: 399-595.
- Watson. JAL, Abbey HM (1977) The development of reproductives in *Nasutitennes exitiosus* (Hill) (Isoptera: Termitidae). *J Aust Ent Soc* 16: 161-164.
